# Supplementary material for: Baseline Absolute Lymphocyte Count and ECOG Performance Score Are Associated with Survival in Advanced Non-Small Cell Lung Cancer Undergoing PD-1/PD-L1 Blockade
Source: MDPI journal article supplement (doi:10.3390/jcm8071014), 2019-07-10
Supplement: s1 [file s1]

**Table S1.** Optimal quantile cut-offs for dichotomization of patients for NLR, ALC, and ANC based on maximal Harrel's C-index.

| QUANTILE [%] | CUTOFF NLR  | NLR         |             |             |            | ALC          |             |             |          | ANC           |              |             |             |          |               |
|--------------|-------------|-------------|-------------|-------------|------------|--------------|-------------|-------------|----------|---------------|--------------|-------------|-------------|----------|---------------|
|              |             | N1 (NLR_LO) | N2 (NLR_HI) | C-INDEX_PFS | C-INDEX_OS | CUTOFF ALC   | N1 (ALC_LO) | N2 (ALC_HI) | CIND_PFS | C-INDEX_OS    | CUTOFF ANC   | N1 (ANC_LO) | N2 (ANC_HI) | CIND_PFS | C-INDEX_OS    |
| 26           | 3.00        | 39          | 102         | 0.5339      | 0.5879     | 0.874        | 37          | 104         | 0.5488   | 0.5944        | 4.094        | 37          | 104         | 0.4856   | 0.5467        |
| 27           | 3.00        | 39          | 102         | 0.5339      | 0.5879     | 0.896        | 38          | 103         | 0.5499   | 0.5986        | 4.164        | 38          | 103         | 0.4815   | 0.5519        |
| 28           | 3.12        | 40          | 101         | 0.5300      | 0.5778     | 0.902        | 40          | 101         | 0.5509   | 0.6095        | 4.222        | 40          | 101         | 0.5280   | 0.5603        |
| 29           | 3.20        | 42          | 99          | 0.5337      | 0.5894     | <b>0.928</b> | 41          | 100         | 0.5591   | <b>0.6210</b> | 4.276        | 41          | 100         | 0.4768   | 0.5617        |
| 30           | 3.30        | 46          | 95          | 0.5293      | 0.5845     | 0.950        | 44          | 97          | 0.5485   | 0.6071        | 4.390        | 44          | 97          | 0.4764   | 0.5644        |
| 31           | 3.30        | 46          | 95          | 0.5293      | 0.5845     | 0.954        | 44          | 97          | 0.5485   | 0.6071        | 4.396        | 44          | 97          | 0.4764   | 0.5644        |
| 32           | 3.30        | 46          | 95          | 0.5293      | 0.5845     | 0.976        | 45          | 96          | 0.5563   | 0.6056        | 4.449        | 45          | 96          | 0.4733   | 0.5636        |
| 33           | 3.40        | 49          | 92          | 0.5432      | 0.5995     | 0.984        | 47          | 94          | 0.5540   | 0.5999        | 4.552        | 47          | 94          | 0.4711   | 0.5722        |
| 34           | 3.40        | 49          | 92          | 0.5432      | 0.5995     | 1.006        | 48          | 93          | 0.5596   | 0.6010        | 4.566        | 48          | 93          | 0.4767   | 0.5711        |
| 35           | 3.50        | 51          | 90          | 0.5414      | 0.6045     | 1.010        | 51          | 90          | 0.5515   | 0.6137        | 4.570        | 50          | 91          | 0.4771   | 0.5648        |
| 36           | 3.54        | 51          | 90          | 0.5414      | 0.6045     | 1.018        | 51          | 90          | 0.5515   | 0.6137        | 4.638        | 51          | 90          | 0.5291   | 0.5710        |
| 37           | 3.60        | 54          | 87          | 0.5419      | 0.6087     | 1.038        | 52          | 89          | 0.5488   | 0.6102        | 4.750        | 52          | 89          | 0.5352   | 0.5764        |
| 38           | 3.62        | 54          | 87          | 0.5419      | 0.6087     | 1.050        | 56          | 85          | 0.5514   | 0.6091        | 4.782        | 54          | 87          | 0.5228   | 0.5789        |
| 39           | 3.70        | 56          | 85          | 0.5501      | 0.6087     | 1.050        | 56          | 85          | 0.5514   | 0.6091        | <b>4.827</b> | 55          | 86          | 0.5247   | <b>0.5802</b> |
| 40           | <b>3.80</b> | 59          | 82          | 0.5558      | 0.6219     | 1.060        | 58          | 83          | 0.5506   | 0.6057        | 4.850        | 57          | 84          | 0.4840   | 0.5632        |
| 41           | 3.80        | 59          | 82          | 0.5558      | 0.6219     | 1.064        | 58          | 83          | 0.5506   | 0.6057        | 5.024        | 58          | 83          | 0.4849   | 0.5675        |
| 42           | 3.88        | 59          | 82          | 0.5558      | 0.6219     | 1.070        | 60          | 81          | 0.5534   | 0.6068        | 5.068        | 59          | 82          | 0.4800   | 0.5705        |
| 43           | 4.00        | 62          | 79          | 0.5509      | 0.6149     | 1.092        | 61          | 80          | 0.5512   | 0.6035        | 5.112        | 61          | 80          | 0.4865   | 0.5557        |

Individual selected cut-offs are indicated as bold (maximal C-indices are yellow). N1 and N2 are number of patients in the two dichotomized groups.

**Table S2.** Comparison of baseline characteristics between anti-VEGF exposed and anti-VEGF naïve advanced NSCLC patients receiving PD-1/PD-L1 blockade.

|                                    | No Prior/Concomitant<br>Anti-VEGF Therapy<br>N = 125 | Prior/Concomitant<br>Anti-VEGF Therapy *<br>N = 17 | P-value |
|------------------------------------|------------------------------------------------------|----------------------------------------------------|---------|
| <b>Median age (range)</b>          | 67 (26–89)                                           | 63 (50–76)                                         | 0.068 ‡ |
| <b>Sex</b>                         |                                                      |                                                    |         |
| male                               | 73 (58%)                                             | 12 (71%)                                           | 0.336   |
| female                             | 52 (42%)                                             | 5 (29%)                                            |         |
| <b>ECOG performance status</b>     |                                                      |                                                    |         |
| 0                                  | 33 (27%)                                             | 6 (35%)                                            | 0.424   |
| 1                                  | 75 (60%)                                             | 11 (65%)                                           |         |
| 2                                  | 14 (11%)                                             | 0 (0%)                                             |         |
| 3                                  | 3 (2%)                                               | 0 (0%)                                             |         |
| <b>Histology</b>                   |                                                      |                                                    |         |
| non-squamous                       | 79 (63%)                                             | 17 (100%)                                          | 0.002   |
| squamous                           | 46 (37%)                                             | 0 (0%)                                             |         |
| <b>Smoking history</b>             |                                                      |                                                    |         |
| smoker                             | 103 (87%)                                            | 13 (93%)                                           | 0.546   |
| never-smoker                       | 15 (13%)                                             | 1 (7%)                                             |         |
| missing                            | 7 (6%)                                               | 3 (18%)                                            |         |
| <b>TNM stage</b>                   |                                                      |                                                    |         |
| III                                | 15 (12%)                                             | 0 (0%)                                             | 0.131   |
| IV                                 | 110 (88%)                                            | 17 (100%)                                          |         |
| <b>ALK translocation</b>           |                                                      |                                                    |         |
| no                                 | 115 (98%)                                            | 16 (100%)                                          | 0.519   |
| yes                                | 3 (2%)                                               | 0 (0%)                                             |         |
| missing                            | 7 (6%)                                               | 1 (6%)                                             |         |
| <b>EGFR mutation status</b>        |                                                      |                                                    |         |
| wild-type                          | 114 (93%)                                            | 16 (94%)                                           | 0.830   |
| mutant                             | 9 (7%)                                               | 1 (6%)                                             |         |
| missing                            | 2 (2%)                                               | 0 (0%)                                             |         |
| <b>CNS involvement</b>             |                                                      |                                                    |         |
| no                                 | 98 (78%)                                             | 14 (82%)                                           | 0.708   |
| yes                                | 27 (22%)                                             | 3 (18%)                                            |         |
| <b>PD-L1 status</b>                |                                                      |                                                    |         |
| positive                           | 70 (67%)                                             | 5 (36%)                                            | 0.024   |
| negative                           | 35 (33%)                                             | 9 (64%)                                            |         |
| missing                            | 20 (16%)                                             | 3 (18%)                                            |         |
| <b>PD-L1 status category</b>       |                                                      |                                                    |         |
| <1%                                | 35 (34%)                                             | 9 (64%)                                            | 0.052   |
| 1-50%                              | 35 (34%)                                             | 4 (29%)                                            |         |
| >50%                               | 34 (32%)                                             | 1 (7%)                                             |         |
| <b>ICB therapy line</b>            |                                                      |                                                    |         |
| 1 <sup>st</sup> line               | 38 (30%)                                             | 2 (12%)                                            | 0.002   |
| 2 <sup>nd</sup> line               | 62 (50%)                                             | 5 (29%)                                            |         |
| ≥ 3 <sup>rd</sup> line             | 25 (20%)                                             | 10 (59%)                                           |         |
| <b>Immune-checkpoint inhibitor</b> |                                                      |                                                    | 0.215   |

|                                                    |          |          |       |
|----------------------------------------------------|----------|----------|-------|
| nivolumab                                          | 67 (54%) | 12 (71%) |       |
| pembrolizumab                                      | 49 (39%) | 3 (17%)  |       |
| atezolizumab                                       | 9 (7%)   | 2 (12%)  |       |
| <b>Tertiary oncologic center</b>                   |          |          |       |
| Salzburg                                           | 44 (35%) | 6 (35%)  | 0.994 |
| Linz                                               | 81 (65%) | 11 (65%) |       |
| <b>Prior/concomitant denosumab application</b>     |          |          |       |
| no                                                 | 93 (74%) | 13 (77%) | 0.854 |
| yes                                                | 32 (26%) | 4 (23%)  |       |
| <b>Prior radiotherapy<sup>#</sup></b>              |          |          |       |
| no                                                 | 72 (58%) | 7 (41%)  | 0.201 |
| yes                                                | 53 (42%) | 10 (59%) |       |
| <b>Subsequent therapy</b>                          |          |          |       |
| no therapy                                         | 77 (62%) | 8 (47%)  |       |
| taxane-based                                       | 17 (14%) | 2 (12%)  | 0.555 |
| TKI                                                | 14 (11%) | 3 (18%)  |       |
| other                                              | 17 (14%) | 4 (23%)  |       |
| <b>Antibiotic treatment during ICB<sup>§</sup></b> |          |          |       |
| no                                                 | 69 (55%) | 11 (65%) | 0.458 |
| yes                                                | 56 (45%) | 6 (35%)  |       |

ECOG: Eastern Cooperative Oncology Group, EGFR: epidermal growth factor receptor, ALK: Anaplastic lymphoma kinase, PD-L1: programmed cell death ligand 1, ICB: immune-checkpoint blockade, VEGF: vascular endothelial growth factor, TKI: tyrosine kinase inhibitor. † two-sided Wilcoxon rank-sum test, \* bevacizumab, ramucirumab or nintedanib, § administration of antibiotics within a time frame of one month before or one month after initiation of immune-checkpoint blockade, # to the primary tumor or metastases.

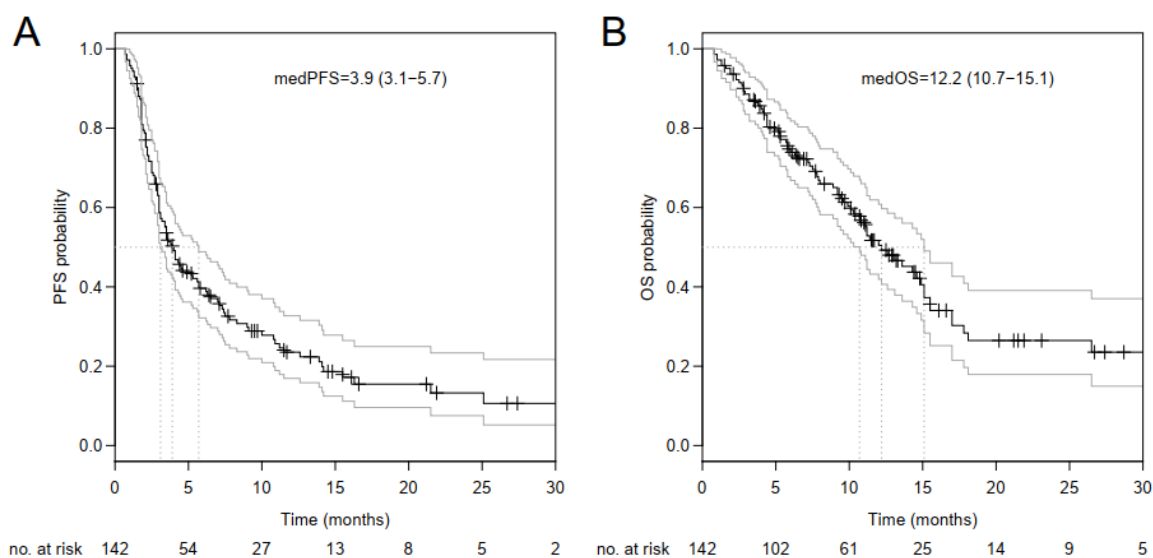

**Figure S1.** Kaplan-Meier curves for PFS (A) and OS (B) from initiation of PD-1/PD-L1 blockade in 142 advanced NSCLC patients. medPFS is median progression free survival and medOS is median overall survival; 95% confidence interval in brackets.

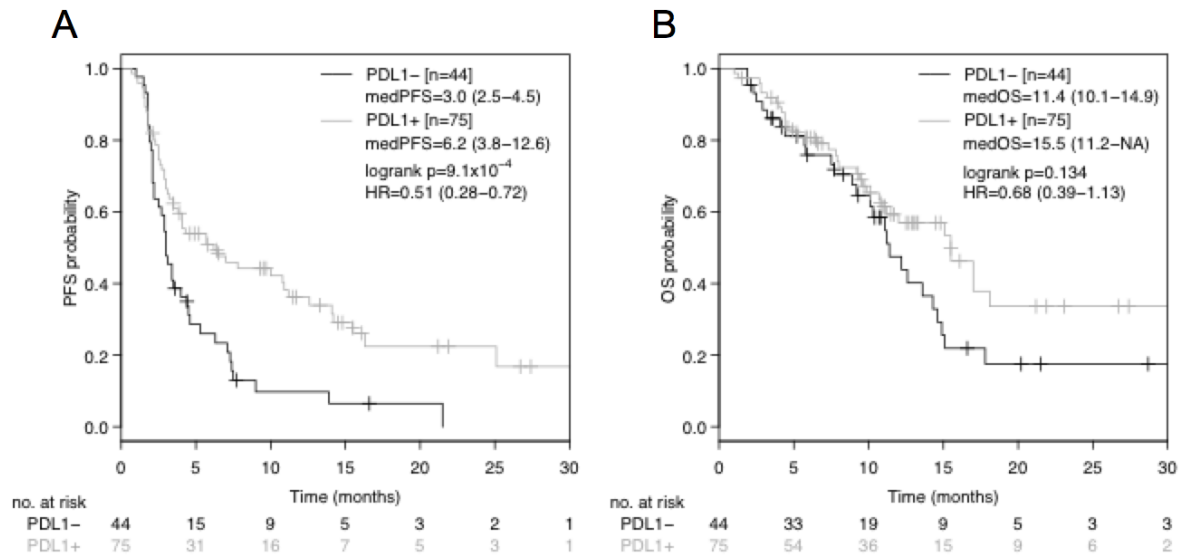

**Figure S2.** Kaplan-Meier curves for PFS and OS according to PD-L1 expression status on tumor cells. Comparison of Kaplan-Meier curves for PFS (A) and OS (B) between PD-L1+ and PD-L1- advanced NSCLC groups. HR is hazard ratio, 95% confidence interval in brackets.

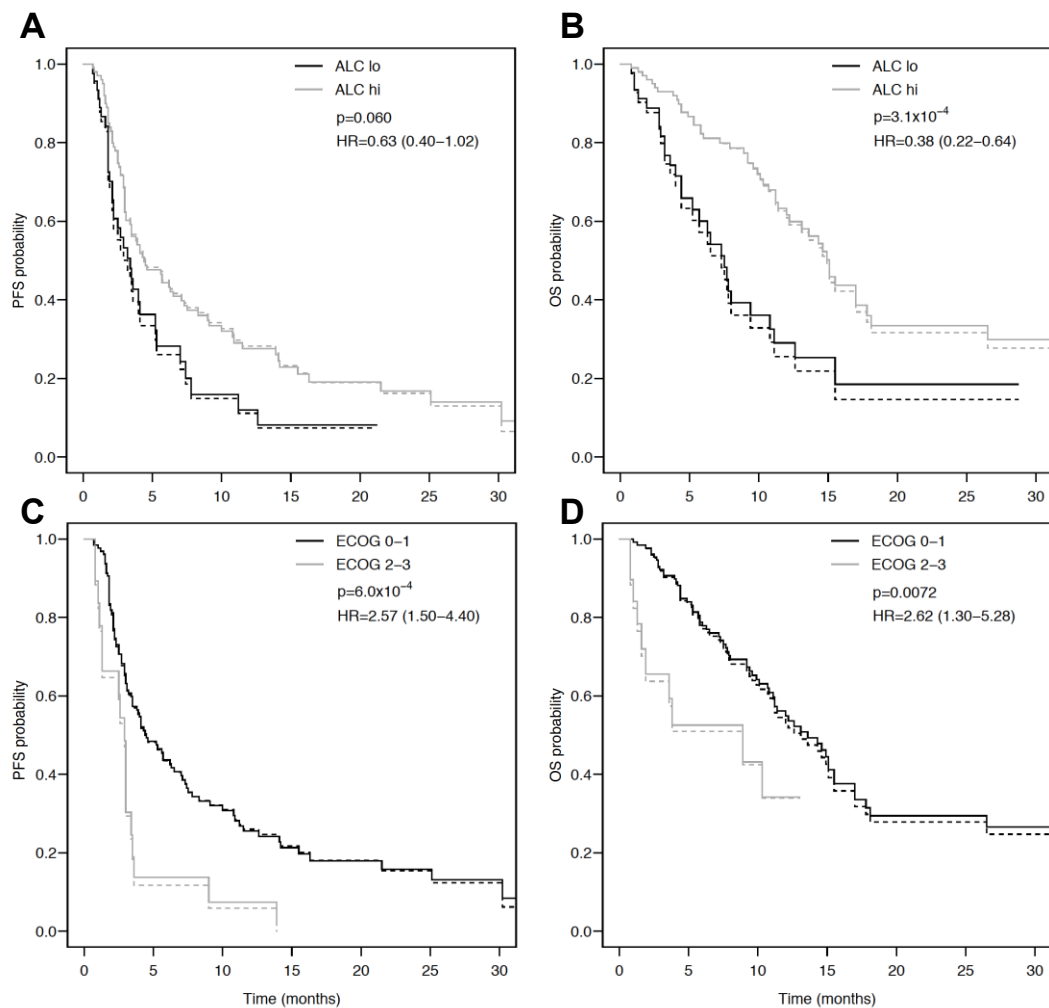

**Figure S3.** Therapy line adjusted survival curves for PFS and OS according to absolute lymphocyte count and ECOG performance status. Comparison of survival curves in advanced NSCLC patients with a baseline ALC  $>0.93 \times 10^9/L$  versus  $\leq 0.93 \times 10^9/L$  for PFS (A) and OS (B), and with a baseline ECOG

performance status >1 versus ≤1 for PFS (C) and OS (D). dotted lines: original; solid lines: adjusted for therapy-line (1+2 versus ≥3). HR is hazard ratio, 95% confidence interval in brackets.

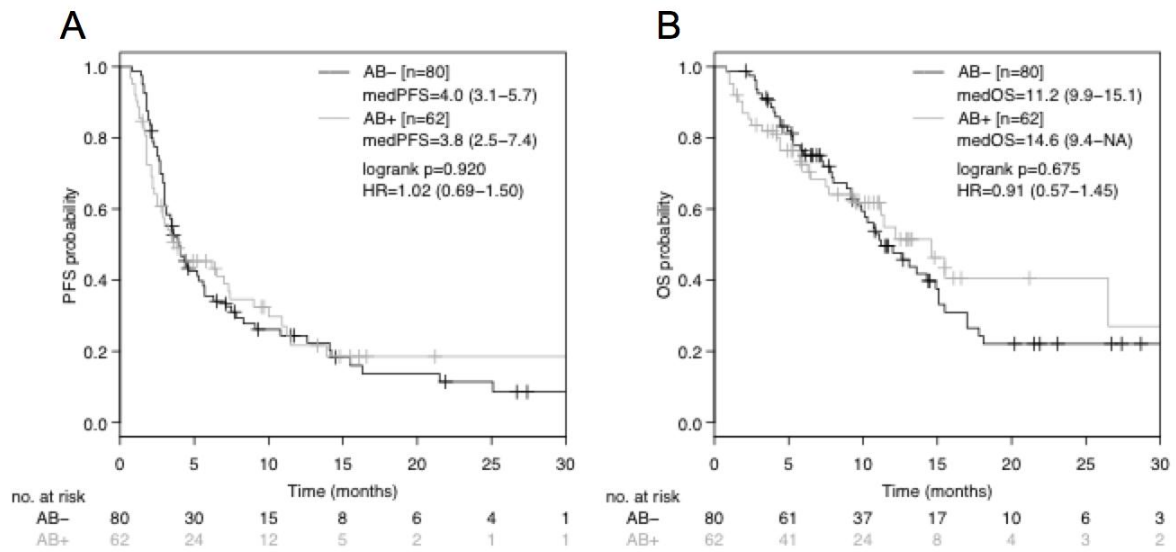

**Figure S4.** Kaplan-Meier curves for PFS and OS according to antibiotic treatment status. Comparison of Kaplan-Meier curves for PFS (A) and OS (B) between antibiotic-positive and antibiotic-negative group in advanced NSCLC. Antibiotic exposure in temporal proximity to immune-checkpoint inhibitor therapy start was defined as antibiotic therapy administration within one month before or one month after initiation of ICB. HR is hazard ratio, 95% confidence interval in brackets.
